# Supplementary material for: Screening Wild Yeast Isolated from Cocoa Bean Fermentation Using Volatile Compounds Profile
Source: MDPI journal article supplement (doi:10.3390/molecules27030902), 2022-01-28
Supplement: s1 [file s1]

Table S1. Range of concentrations of volatile compounds produced by yeasts and their corresponding detection limits

| Family    | Name                        | Concentration (mg/kg) |          | OTV [mg/kg] | Yeast 87     |          | Yeast 195    |          | Yeast 200    |          | Yeast 246    |          |
|-----------|-----------------------------|-----------------------|----------|-------------|--------------|----------|--------------|----------|--------------|----------|--------------|----------|
|           |                             | Min                   | Max      |             | Con. (mg/kg) | Est. Dev |
| Alcohols  | Ethanol                     | 1,9755                | 974,8454 | 40          | 791,736      |          | 607,890      |          | 164,650      |          | 974,845      |          |
|           | 3-methylbutanol             | 0,1687                | 65,4272  | 3           | 38,529       |          | 65,427       |          |              |          | 34,919       |          |
|           | 2-pentanol                  | 0,0813                | 10,2901  | 4           |              |          |              |          | 10,290       |          |              |          |
|           | 2-phenylethanol             | 0,0759                | 51,4509  | 14          | 20,031       |          | 51,451       |          | 32,603       |          | 38,524       |          |
|           | alpha-terpinol              | 0,0034                | 2,4455   | 0,33        | 1,559        |          |              |          |              |          | 1,771        |          |
|           | 2,4-DI-Tert-butylphenol     | 0,1968                | 6,3304   | -           | 6,330        |          |              |          |              |          |              |          |
| Esters    | Ethyl acetate               | 0,0141                | 102,0740 | 5           | -            | -        | 8,466        | 2,351    | -            | -        | -            | -        |
|           | 2-pentyl acetate            | 0,2473                | 14,5378  | 0,005       | 13,179       | 0,487    | 8,863        | 0,343    | -            | -        | 14,538       | 1,015    |
|           | 3-methylbutyl acetate       | 0,0314                | 317,1846 | 0,16        | 95,437       | 15,640   | 55,069       | 0,049    | -            | -        | 81,755       | 2,460    |
|           | Methylpropil acetate        | 0,0315                | 25,1614  | 1,6         | -            | -        | -            | -        | 25,161       | 1,317    | -            | -        |
|           | Ethyl Benzoate              | 0,0002                | 17,3732  | 0,06        | -            | -        | 0,610        | 0,383    | 1,511        | 0,396    | -            | -        |
|           | Di-ethyl Butanodiate        | 0,0245                | 3,8429   | 200         | -            | -        | -            | -        | -            | -        | -            | -        |
|           | Ethyl Octanoate             | 0,0094                | 12,9963  | 0,58        | -            | -        | -            | -        | -            | -        | -            | -        |
|           | 2-phenylethyl acetate       | 0,0081                | 276,7966 | 0,65        | 130,615      | 42,178   | 25,170       | 9,344    | -            | -        | -            | -        |
|           | Ethyl Decanoate             | 0,0104                | 14,3622  | 0,2         | 14,362       | 8,626    | 2,783        | 0,866    | -            | -        | 5,548        | 0,730    |
|           | Ethyl 3-Phenylpropanoate    | 0,0547                | 12,0306  | 0,0016      | 12,031       | 2,725    | -            | -        | -            | -        | 6,663        | 0,231    |
|           | Ethyl 3-Phenyl-2-propenoate | 0,0355                | 6,9843   | 0,0011      | -            | -        | 3,992        | 1,469    | 4,778        | 3,511    | -            | -        |
|           | Ethyl Dodecanoate           | 0,0150                | 10,4593  | 1,5         | -            | -        | -            | -        | -            | -        | -            | -        |
| Aldehydes | 3-methylbutanal             | 0,0069                | 18,6677  | 0,001       | -            | -        | 3,947        | 0,794    | -            | -        | 18,668       | 2,997    |
|           | Phenylacetaldehyde          | 0,0054                | 54,0838  | 0,004       | -            | -        | 12,219       | 3,138    | -            | -        | 54,084       | 19,813   |
|           | 2-phenyl-2-butenal          | 0,0107                | 0,1917   | 1,7         | -            | -        | -            | -        | -            | -        | -            | -        |

|           |                                                   |        |         |       |        |       |       |       |       |   |       |       |
|-----------|---------------------------------------------------|--------|---------|-------|--------|-------|-------|-------|-------|---|-------|-------|
| Ketones   | 4-methyl-2-phenyl-2-pentenal                      | 0,0007 | 2,9953  | -     | -      | -     | -     | -     | -     | - | 2,995 | 0,330 |
|           | 5-methyl-2-phneyl-2-hexenal                       | 0,0029 | 3,0785  | -     | -      | -     | -     | -     | -     | - | -     | -     |
|           | 3-hydroxi-2-butanone                              | 0,0013 | 0,0603  | 150   | -      | -     | -     | -     | -     | - | -     | -     |
|           | 2-heptanone                                       | 0,0125 | 1,6152  | 0,14  | -      | -     | 0,918 | 0,030 | -     | - | 1,496 | 0,040 |
|           | 2-octanone                                        | 0,0077 | 0,0254  | 0,05  | -      | -     | -     | -     | -     | - | -     | -     |
|           | 2-nonanone                                        | 0,0158 | 0,1291  | 0,2   | -      | -     | -     | -     | -     | - | -     | -     |
| Acids     | 6-methyl-3,5-dihydroxi-2,3-dihydro-4h-pyran-4-one | 0,0001 | 0,3478  | 0,25  | -      | -     | 0,180 | 0,041 | -     | - | -     | -     |
|           | Acetic acid                                       | 0,0079 | 76,8848 | 33    | 76,885 | 3,918 | -     | -     | -     | - | 1,388 | 0,120 |
|           | 2 methyl propanoic acid                           | 0,0027 | 0,0861  | 2,3   | -      | -     | -     | -     | -     | - | -     | -     |
|           | 3-methylbutanoic acid                             | 0,0009 | 13,0664 | 0,022 | 13,066 | 0,347 | -     | -     | -     | - | -     | -     |
|           | 2-methylbutanoic Acid                             | 0,0125 | 0,6547  | 0,05  | -      | -     | -     | -     | -     | - | -     | -     |
|           | Decanoic acid                                     | 0,4681 | 3,0440  | 10    | 1,054  | 0,468 | 3,044 | 1,032 | -     | - | -     | -     |
| Pyrazines | Dodecanoic acid                                   | 0,0447 | 0,3476  | -     | -      | -     | -     | -     | -     | - | -     | -     |
|           | 2-methylpyrazine                                  | 6,4451 | 6,4451  | 2,5   | -      | -     | -     | -     | 6,445 | - | -     | -     |
|           | 2,3,5-trimethylpyrazine                           | 0,0178 | 0,2596  | 1,8   | -      | -     | -     | -     | 0,023 | - | -     | -     |

Concentration matrix of volatile compounds produced by Yeast 01, Yeast 4, Yeast 11c and Yeast 12.

| Family    | Name                         | Yeast 01     |          | Yeast 4      |          | Yeast 11c    |          | Yeast 12     |          |
|-----------|------------------------------|--------------|----------|--------------|----------|--------------|----------|--------------|----------|
|           |                              | Con. (mg/kg) | Est. Dev |
| Alcohols  | Ethanol                      | 28,163       | -        | 59,493       | -        | 49,959       | -        | 41,199       | -        |
|           | 3-methylbutanol              | 5,456        | -        | 6,651        | -        | 8,664        | -        | 1,381        | -        |
|           | 2-pentanol                   | -            | -        | -            | -        | -            | -        | -            | -        |
|           | 2-phenylethanol              | 3,123        | -        | 7,621        | -        | 10,051       | -        | 0,801        | -        |
|           | alpha-terpinol               | -            | -        | 0,252        | -        | -            | -        | -            | -        |
|           | 2,4-DI-Tert-butylphenol      | 0,951        | -        | -            | -        | -            | -        | -            | -        |
| Esters    | Ethyl acetate                | 56,392       | 1,631    | 18,041       | 17,018   | 85,453       | 7,945    | 22,093       | 3,284    |
|           | 2-pentyl acetate             | -            | -        | -            | -        | -            | -        | -            | -        |
|           | 3-methylbutyl acetate        | 14,571       | 1,268    | 8,905        | 1,436    | 9,897        | 0,600    | 4,376        | 0,905    |
|           | Methylpropil acetate         | -            | -        | -            | -        | -            | -        | -            | -        |
|           | Ethyl Benzoate               | -            | -        | -            | -        | 0,178        | 0,000    | -            | -        |
|           | Di-ethyl Butanodiate         | -            | -        | 1,312        | 0,124    | 2,285        | 0,025    | -            | -        |
|           | Ethyl Octanoate              | -            | -        | -            | -        | 0,756        | 0,021    | 0,698        | 0,638    |
|           | 2-phenylethyl acetate        | 40,116       | 1,113    | 2,264        | 1,418    | 6,012        | 0,791    | 15,387       | 3,453    |
|           | Ethyl Decanoate              | -            | -        | 0,322        | 0,014    | 1,265        | 0,265    | 3,408        | 2,504    |
|           | Ethyl 3-Phenylpropanoate     | 2,015        | 0,273    | -            | -        | 0,998        | 0,134    | 3,238        | 0,229    |
|           | Ethyl 3-Phenyl-2-propenoate  | -            | -        | -            | -        | 0,989        | 0,106    | -            | -        |
|           | Ethyl Dodecanoate            | -            | -        | -            | -        | -            | -        | 1,882        | 0,015    |
| Aldehydes | 3-methylbutanal              | -            | -        | -            | -        | 0,287        | 0,029    | -            | -        |
|           | Phenylacetaldehyde           | -            | -        | 0,456        | 0,219    | -            | -        | -            | -        |
|           | 2-phenyl-2-butenal           | -            | -        | -            | -        | -            | -        | -            | -        |
|           | 4-methyl-2-phenyl-2-pentenal | 0,895        | 0,237    | -            | -        | -            | -        | 1,148        | 0,264    |
|           | 5-methyl-2-phneyl-2-hexenal  | -            | -        | -            | -        | -            | -        | 1,038        | 0,003    |
| Ketones   | 3-hydroxi-2-butanone         | -            | -        | -            | -        | 0,031        | 0,001    | -            | -        |
|           | 2-heptanone                  | -            | -        | -            | -        | -            | -        | -            | -        |
|           | 2-octanone                   | -            | -        | -            | -        | -            | -        | -            | -        |
|           | 2-nonanone                   | -            | -        | 0,129        | 0,053    | -            | -        | -            | -        |

|           |                                                   |       |       |   |   |       |       |   |   |
|-----------|---------------------------------------------------|-------|-------|---|---|-------|-------|---|---|
|           | 6-methyl-3,5-dihydroxi-2,3-dihydro-4h-pyran-4-one | 0,054 | 0,010 | - | - | -     | -     | - | - |
| Acids     | Acetic acid                                       | -     | -     | - | - | -     | -     | - | - |
|           | 2 methyl propanoic acid                           | -     | -     | - | - | -     | -     | - | - |
|           | 3-methylbutanoic acid                             | -     | -     | - | - | 0,219 | 0,006 | - | - |
|           | 2-methylbutanoic Acid                             | 0,373 | 0,061 | - | - | -     | -     | - | - |
|           | Decanoic acid                                     | -     | -     | - | - | -     | -     | - | - |
|           | Dodecanoic acid                                   | -     | -     | - | - | -     | -     | - | - |
| Pyrazines | 2-methylpyrazine                                  | -     | -     | - | - | -     | -     | - | - |
|           | 2,3,5-trimethylpyrazine                           | -     | -     | - | - | -     | -     | - | - |

Matrix of concentrations of volatile compounds produced by Yeast 13a, Yeast 17, Yeast 19 and Yeast 29a.

| Family   | Name                     | Yeast 13a    |          | Yeast 17     |          | Yeast 19     |          | Yeast 29a    |          |
|----------|--------------------------|--------------|----------|--------------|----------|--------------|----------|--------------|----------|
|          |                          | Con. (mg/kg) | Est. Dev |
| Alcohols | Ethanol                  | 61,350       | -        | 27,249       | -        | 33,577       | -        | 105,472      | -        |
|          | 3-methylbutanol          | -            | -        | 4,981        | -        | 5,401        | -        | -            | -        |
|          | 2-pentanol               | 2,727        | -        | -            | -        | -            | -        | -            | -        |
|          | 2-phenylethanol          | 1,075        | -        | 1,544        | -        | 2,987        | -        | 1,494        | -        |
|          | alpha-terpinol           | 0,084        | -        | -            | -        | -            | -        | -            | -        |
|          | 2,4-DI-Tert-butylphenol  | 0,656        | -        | -            | -        | -            | -        | -            | -        |
| Esters   | Ethyl acetate            | 15,318       | 1,027    | -            | -        | 1,276        | 0,269    | 1,457        | 0,023    |
|          | 2-pentyl acetate         | -            | -        | -            | -        | -            | -        | -            | -        |
|          | 3-methylbutyl acetate    | -            | -        | -            | -        | 0,766        | 0,192    | 1,560        | 0,137    |
|          | Methylpropil acetate     | -            | -        | -            | -        | -            | -        | -            | -        |
|          | Ethyl Benzoate           | -            | -        | -            | -        | -            | -        | -            | -        |
|          | Di-ethyl Butanodiate     | -            | -        | -            | -        | -            | -        | -            | -        |
|          | Ethyl Octanoate          | -            | -        | -            | -        | 12,996       | 1,360    | 10,557       | 0,409    |
|          | 2-phenylethyl acetate    | 9,845        | 0,489    | -            | -        | 0,608        | 0,085    | 1,820        | 0,836    |
|          | Ethyl Decanoate          | 0,266        | 0,106    | 0,348        | 0,010    | 1,952        | 0,139    | -            | -        |
|          | Ethyl 3-Phenylpropanoate | 1,307        | 0,478    | -            | -        | 5,716        | 0,756    | 5,344        | 0,984    |

|           |                                                   |       |       |       |       |       |       |       |       |
|-----------|---------------------------------------------------|-------|-------|-------|-------|-------|-------|-------|-------|
| Aldehydes | Ethyl 3-Phenyl-2-propenoate                       | -     | -     | -     | -     | 6,602 | 0,693 | -     | -     |
|           | Ethyl Dodecanoate                                 | -     | -     | -     | -     | -     | -     | 0,693 | 0,038 |
|           | 3-methylbutanal                                   | -     | -     | -     | -     | -     | -     | -     | -     |
|           | Phenylacetaldehyde                                | -     | -     | 2,020 | 0,153 | -     | -     | -     | -     |
|           | 2-phenyl-2-butenal                                | -     | -     | -     | -     | 0,192 | 0,063 | -     | -     |
| Ketones   | 4-methyl-2-phenyl-2-pentenal                      | 0,444 | 0,125 | -     | -     | 0,820 | 0,031 | -     | -     |
|           | 5-methyl-2-phneyl-2-hexenal                       | -     | -     | -     | -     | -     | -     | -     | -     |
|           | 3-hydroxi-2-butanone                              | -     | -     | -     | -     | -     | -     | -     | -     |
|           | 2-heptanone                                       | -     | -     | -     | -     | -     | -     | -     | -     |
|           | 2-octanone                                        | -     | -     | -     | -     | -     | -     | -     | -     |
| Acids     | 2-nonanone                                        | -     | -     | -     | -     | -     | -     | -     | -     |
|           | 6-methyl-3,5-dihydroxi-2,3-dihydro-4h-pyran-4-one | 0,012 | 0,000 | 0,060 | 0,006 | -     | -     | -     | -     |
|           | Acetic acid                                       | -     | -     | -     | -     | -     | -     | -     | -     |
|           | 2 methyl propanoic acid                           | -     | -     | -     | -     | -     | -     | -     | -     |
|           | 3-methylbutanoic acid                             | -     | -     | -     | -     | -     | -     | -     | -     |
| Pyrazines | 2-methylbutanoic Acid                             | 0,655 | 0,012 | -     | -     | -     | -     | -     | -     |
|           | Decanoic acid                                     | -     | -     | -     | -     | -     | -     | -     | -     |
|           | Dodecanoic acid                                   | -     | -     | -     | -     | -     | -     | -     | -     |
|           | 2-methylpyrazine                                  | -     | -     | -     | -     | -     | -     | -     | -     |
|           | 2,3,5-trimethylpyrazine                           | -     | -     | -     | -     | 0,260 | 0,050 | -     | -     |

Concentration matrix of volatile compounds produced by Yeast 33, Yeast 45, Yeast 47 and Yeast 52.

| Family   | Name            | Yeast 33     |          | Yeast 45     |          | Yeast 47     |          | Yeast 52     |          |
|----------|-----------------|--------------|----------|--------------|----------|--------------|----------|--------------|----------|
|          |                 | Con. (mg/kg) | Est. Dev |
| Alcohols | Ethanol         | 119,706      | -        | -            | -        | -            | -        | 1,975        | -        |
|          | 3-methylbutanol | 8,859        | -        | -            | -        | 0,532        | -        | -            | -        |
|          | 2-pentanol      | -            | -        | -            | -        | -            | -        | -            | -        |
|          | 2-phenylethanol | 4,664        | -        | 0,303        | -        | 0,117        | -        | -            | -        |
|          | alpha-terpinol  | -            | -        | -            | -        | -            | -        | -            | -        |

|           |                                                   |        |       |       |       |        |       |       |       |
|-----------|---------------------------------------------------|--------|-------|-------|-------|--------|-------|-------|-------|
| Esters    | 2,4-DI-Tert-butylphenol                           | -      | -     | -     | -     | 1,062  | -     | -     | -     |
|           | Ethyl acetate                                     | 0,681  | 0,193 | -     | -     | -      | -     | -     | -     |
|           | 2-penthyl acetate                                 | -      | -     | -     | -     | -      | -     | -     | -     |
|           | 3-methylbutyl acetate                             | 0,766  | 0,312 | -     | -     | -      | -     | -     | -     |
|           | Methylpropil acetate                              | 0,768  | 0,232 | -     | -     | -      | -     | -     | -     |
|           | Ethyl Benzoate                                    | -      | -     | -     | -     | -      | -     | 0,070 | 0,065 |
|           | Di-ethyl Butanodiate                              | -      | -     | -     | -     | -      | -     | -     | -     |
|           | Ethyl Octanoate                                   | 11,195 | 2,463 | -     | -     | -      | -     | -     | -     |
|           | 2-phenylethyl acetate                             | 0,797  | 0,165 | 0,360 | 0,217 | 12,471 | 0,315 | 5,570 | 0,448 |
|           | Ethyl Decanoate                                   | 6,924  | 0,769 | -     | -     | -      | -     | -     | -     |
|           | Ethyl 3-Phenylpropanoate                          | 5,488  | 1,382 | -     | -     | -      | -     | 0,464 | 0,107 |
|           | Ethyl 3-Phenyl-2-propenoate                       | 6,984  | 0,200 | 0,660 | 0,060 | -      | -     | 0,292 | 0,233 |
| Aldehydes | Ethyl Dodecanoate                                 | -      | -     | -     | -     | -      | -     | -     | -     |
|           | 3-methylbutanal                                   | -      | -     | -     | -     | -      | -     | -     | -     |
|           | Phenylacetaldehyde                                | -      | -     | -     | -     | -      | -     | -     | -     |
|           | 2-phenyl-2-butenal                                | -      | -     | -     | -     | -      | -     | -     | -     |
|           | 4-methyl-2-phenyl-2-pentenal                      | 1,092  | 0,001 | -     | -     | -      | -     | -     | -     |
| Ketones   | 5-methyl-2-phneyl-2-hexenal                       | -      | -     | -     | -     | -      | -     | -     | -     |
|           | 3-hydroxi-2-butanone                              | -      | -     | -     | -     | -      | -     | -     | -     |
|           | 2-heptanone                                       | -      | -     | -     | -     | -      | -     | -     | -     |
|           | 2-octanone                                        | -      | -     | -     | -     | -      | -     | -     | -     |
|           | 2-nonanone                                        | 0,080  | 0,016 | -     | -     | -      | -     | -     | -     |
| Acids     | 6-methyl-3,5-dihydroxi-2,3-dihydro-4h-pyran-4-one | 0,027  | 0,002 | 0,029 | 0,003 | 0,348  | 0,073 | 0,032 | 0,004 |
|           | Acetic acid                                       | -      | -     | -     | -     | -      | -     | -     | -     |
|           | 2 methyl propanoic acid                           | -      | -     | -     | -     | -      | -     | -     | -     |
|           | 3-methylbutanoic acid                             | -      | -     | -     | -     | -      | -     | -     | -     |
|           | 2-methylbutanoic Acid                             | -      | -     | -     | -     | -      | -     | -     | -     |
|           | Decanoic acid                                     | -      | -     | -     | -     | -      | -     | -     | -     |
|           | Dodecanoic acid                                   | -      | -     | -     | -     | 0,348  | 0,045 | -     | -     |
|           | 2-methylpyrazine                                  | -      | -     | -     | -     | -      | -     | -     | -     |
| Pyrazines | 2,3,5-trimethylpyrazine                           | 0,173  | 0,018 | -     | -     | -      | -     | -     | -     |

Concentration matrix of volatile compounds produced by Yeast 73, Yeast 85, Yeast 87 and Yeast 92a.

| Family    | Name                         | Yeast 73     |          | Yeast 85     |          | Yeast 87     |          | Yeast 92a    |          |
|-----------|------------------------------|--------------|----------|--------------|----------|--------------|----------|--------------|----------|
|           |                              | Con. (mg/kg) | Est. Dev |
| Alcohols  | Ethanol                      | 148,228      | -        | 44,079       | -        | 791,736      | -        | 21,912       | -        |
|           | 3-methylbutanol              | 2,669        | -        | 11,556       | -        | 38,529       | -        | 3,008        | -        |
|           | 2-pentanol                   | -            | -        | -            | -        | -            | -        | -            | -        |
|           | 2-phenylethanol              | 1,028        | -        | 6,879        | -        | 20,031       | -        | 1,952        | -        |
|           | alpha-terpinol               | -            | -        | -            | -        | 1,559        | -        | -            | -        |
|           | 2,4-DI-Tert-butylphenol      | -            | -        | -            | -        | 6,330        | -        | -            | -        |
| Esters    | Ethyl acetate                | 67,861       | 13,035   | 0,718        | 0,171    | -            | -        | -            | -        |
|           | 2-pentyl acetate             | -            | -        | -            | -        | 13,179       | 0,487    | -            | -        |
|           | 3-methylbutyl acetate        | 210,306      | 14,868   | 1,260        | 0,189    | 95,437       | 15,640   | -            | -        |
|           | Methylpropil acetate         | -            | -        | -            | -        | -            | -        | -            | -        |
|           | Ethyl Benzoate               | -            | -        | -            | -        | -            | -        | -            | -        |
|           | Di-ethyl Butanodiate         | 1,029        | 0,084    | -            | -        | -            | -        | -            | -        |
|           | Ethyl Octanoate              | 0,251        | 0,070    | 11,098       | 1,553    | -            | -        | -            | -        |
|           | 2-phenylethyl acetate        | 141,387      | 8,485    | 0,988        | 0,225    | 130,615      | 42,178   | -            | -        |
|           | Ethyl Decanoate              | 2,141        | 1,105    | 1,460        | 1,026    | 14,362       | 8,626    | 0,124        | 0,069    |
|           | Ethyl 3-Phenylpropanoate     | 1,386        | 0,303    | 5,878        | 1,086    | 12,031       | 2,725    | -            | -        |
|           | Ethyl 3-Phenyl-2-propenoate  | -            | -        | -            | -        | -            | -        | -            | -        |
|           | Ethyl Dodecanoate            | -            | -        | -            | -        | -            | -        | -            | -        |
| Aldehydes | 3-methylbutanal              | -            | -        | -            | -        | -            | -        | -            | -        |
|           | Phenylacetaldehyde           | -            | -        | 0,268        | 0,035    | -            | -        | 0,170        | 0,188    |
|           | 2-phenyl-2-butenal           | -            | -        | -            | -        | -            | -        | -            | -        |
|           | 4-methyl-2-phenyl-2-pentenal | 0,641        | 0,135    | -            | -        | -            | -        | -            | -        |
|           | 5-methyl-2-phneyl-2-hexenal  | -            | -        | -            | -        | -            | -        | -            | -        |
| Ketones   | 3-hydroxi-2-butanone         | 0,060        | 0,002    | -            | -        | -            | -        | -            | -        |
|           | 2-heptanone                  | -            | -        | -            | -        | -            | -        | -            | -        |

|           |                                                   |       |       |       |       |        |       |   |   |
|-----------|---------------------------------------------------|-------|-------|-------|-------|--------|-------|---|---|
|           | 2-octanone                                        | -     | -     | -     | -     | -      | -     | - | - |
|           | 2-nonanone                                        | -     | -     | -     | -     | -      | -     | - | - |
|           | 6-methyl-3,5-dihydroxi-2,3-dihydro-4h-pyran-4-one | 0,033 | 0,010 | -     | -     | -      | -     | - | - |
| Acids     | Acetic acid                                       | -     | -     | -     | -     | 76,885 | 3,918 | - | - |
|           | 2 methyl propanoic acid                           | -     | -     | -     | -     | -      | -     | - | - |
|           | 3-methylbutanoic acid                             | -     | -     | -     | -     | 13,066 | 0,347 | - | - |
|           | 2-methylbutanoic Acid                             | -     | -     | -     | -     | -      | -     | - | - |
|           | Decanoic acid                                     | -     | -     | -     | -     | 1,054  | 0,468 | - | - |
| Pyrazines | Dodecanoic acid                                   | -     | -     | -     | -     | -      | -     | - | - |
|           | 2-methylpyrazine                                  | -     | -     | -     | -     | -      | -     | - | - |
|           | 2,3,5-trimethylpyrazine                           | -     | -     | 0,170 | 0,061 | -      | -     | - | - |

Concentration matrix of volatile compounds produced by Yeast 92c, Yeast 97, Yeast 105 and Yeast 109sba.

| Family   | Name                    | Yeast 92c    |          | Yeast 97     |          | Yeast 105    |          | Yeast 109 sba |          |
|----------|-------------------------|--------------|----------|--------------|----------|--------------|----------|---------------|----------|
|          |                         | Con. (mg/kg) | Est. Dev | Con. (mg/kg) | Est. Dev | Con. (mg/kg) | Est. Dev | Con. (mg/kg)  | Est. Dev |
| Alcohols | Ethanol                 | 25,963       | -        | 131,046      | -        | 42,112       | -        | 70,617        | -        |
|          | 3-methylbutanol         | -            | -        | 4,323        | -        | 0,169        | -        | 5,339         | -        |
|          | 2-pentanol              | 0,889        | -        | -            | -        | 2,110        | -        | -             | -        |
|          | 2-phenylethanol         | 0,528        | -        | 2,092        | -        | 1,555        | -        | 3,359         | -        |
|          | alpha-terpinol          | -            | -        | 0,286        | -        | -            | -        | -             | -        |
|          | 2,4-DI-Tert-butylphenol | 0,197        | -        | 0,591        | -        | 0,905        | -        | -             | -        |
| Esters   | Ethyl acetate           | -            | -        | 31,601       | 9,218    | 19,746       | 0,071    | 1,847         | 0,148    |
|          | 2-penthyl acetate       | -            | -        | -            | -        | -            | -        | -             | -        |
|          | 3-methylbutyl acetate   | -            | -        | 5,895        | 1,076    | 4,110        | 0,397    | -             | -        |
|          | Methylpropil acetate    | -            | -        | -            | -        | -            | -        | -             | -        |
|          | Ethyl Benzoate          | -            | -        | 0,545        | 0,016    | 17,373       | 3,831    | -             | -        |
|          | Di-ethyl Butanodiate    | -            | -        | -            | -        | 0,252        | 0,161    | -             | -        |
|          | Ethyl Octanoate         | -            | -        | -            | -        | 1,653        | 0,365    | 0,524         | 0,009    |
|          | 2-phenylethyl acetate   | 0,204        | 0,124    | 21,213       | 2,823    | -            | -        | 1,842         | 0,165    |



|           |                                                   |       |       |       |       |       |       |       |       |
|-----------|---------------------------------------------------|-------|-------|-------|-------|-------|-------|-------|-------|
| Aldehydes | Ethyl Decanoate                                   | 0,072 | 0,039 | 6,693 | 2,356 | -     | -     | 1,463 | 0,583 |
|           | Ethyl 3-Phenylpropanoate                          | -     | -     | 1,082 | 0,750 | -     | -     | 3,766 | 1,041 |
|           | Ethyl 3-Phenyl-2-propenoate                       | -     | -     | 3,519 | 0,641 | 0,145 | 0,049 | -     | -     |
|           | Ethyl Dodecanoate                                 | -     | -     | 2,946 | 0,059 | 0,955 | 0,110 | -     | -     |
|           | 3-methylbutanal                                   | -     | -     | -     | -     | -     | -     | -     | -     |
|           | Phenylacetaldehyde                                | -     | -     | -     | -     | -     | -     | -     | -     |
|           | 2-phenyl-2-butenal                                | -     | -     | -     | -     | -     | -     | -     | -     |
|           | 4-methyl-2-phenyl-2-pentenal                      | -     | -     | 1,612 | 0,061 | 0,364 | 0,053 | 1,214 | 0,219 |
| Ketones   | 5-methyl-2-phenyl-2-hexenal                       | -     | -     | -     | -     | -     | -     | -     | -     |
|           | 3-hydroxi-2-butanone                              | -     | -     | -     | -     | 0,018 | 0,005 | -     | -     |
|           | 2-heptanone                                       | -     | -     | -     | -     | -     | -     | -     | -     |
|           | 2-octanone                                        | -     | -     | -     | -     | -     | -     | -     | -     |
|           | 2-nonanone                                        | -     | -     | -     | -     | -     | -     | -     | -     |
| Acids     | 6-methyl-3,5-dihydroxi-2,3-dihydro-4h-pyran-4-one | -     | -     | 0,196 | 0,028 | -     | -     | 0,083 | 0,015 |
|           | Acetic acid                                       | 0,115 | 0,008 | -     | -     | -     | -     | -     | -     |
|           | 2 methyl propanoic acid                           | -     | -     | -     | -     | -     | -     | -     | -     |
|           | 3-methylbutanoic acid                             | 0,038 | 0,002 | -     | -     | 0,048 | 0,022 | -     | -     |
|           | 2-methylbutanoic Acid                             | -     | -     | -     | -     | -     | -     | -     | -     |
|           | Decanoic acid                                     | -     | -     | -     | -     | -     | -     | -     | -     |
|           | Dodecanoic acid                                   | -     | -     | -     | -     | -     | -     | -     | -     |
| Pyrazines | 2-methylpyrazine                                  | -     | -     | -     | -     | -     | -     | -     | -     |
|           | 2,3,5-trimethylpyrazine                           | -     | -     | -     | -     | -     | -     | -     | -     |

Concentration matrix of volatile compounds produced by Yeast 110mrs, Yeast 110sba, Yeast 111 and Yeast 112b.

| Family   | Name            | Yeast 110 mrs |          | Yeast 110 sba |          | Yeast 111    |          | Yeast 112b   |          |
|----------|-----------------|---------------|----------|---------------|----------|--------------|----------|--------------|----------|
|          |                 | Con. (mg/kg)  | Est. Dev | Con. (mg/kg)  | Est. Dev | Con. (mg/kg) | Est. Dev | Con. (mg/kg) | Est. Dev |
| Alcohols | Ethanol         | 25,315        | -        | 179,763       | -        | 8,359        | -        | 36,057       | -        |
|          | 3-methylbutanol | 0,395         | -        | 3,450         | -        | 0,185        | -        | 3,048        | -        |
|          | 2-pentanol      | -             | -        | -             | -        | -            | -        | -            | -        |
|          | 2-phenylethanol | 0,220         | -        | 1,748         | -        | 0,076        | -        | 3,147        | -        |

|           |                                                   |         |        |        |       |        |       |        |        |
|-----------|---------------------------------------------------|---------|--------|--------|-------|--------|-------|--------|--------|
|           | alpha-terpinol                                    | 0,003   | -      | 0,235  | -     | -      | -     | -      | -      |
|           | 2,4-DI-Tert-butylphenol                           | 0,531   | -      | 0,376  | -     | -      | -     | 0,679  | -      |
| Esters    | Ethyl acetate                                     | 102,074 | 11,216 | -      | -     | 4,546  | 0,782 | 75,954 | 10,351 |
|           | 2-penthyl acetate                                 | -       | -      | -      | -     | -      | -     | -      | -      |
|           | 3-methylbutyl acetate                             | 317,185 | 9,691  | 3,480  | 0,165 | 14,806 | 2,925 | 11,690 | 1,802  |
|           | Methylpropil acetate                              | -       | -      | -      | -     | -      | -     | -      | -      |
|           | Ethyl Benzoate                                    | -       | -      | 0,751  | 0,043 | -      | -     | 0,680  | 0,119  |
|           | Di-ethyl Butanodiate                              | -       | -      | -      | -     | -      | -     | -      | -      |
|           | Ethyl Octanoate                                   | -       | -      | -      | -     | -      | -     | 0,737  | 0,024  |
|           | 2-phenylethyl acetate                             | 218,029 | 19,022 | 28,502 | 0,837 | 11,358 | 2,592 | 45,949 | 3,989  |
|           | Ethyl Decanoate                                   | 6,183   | 1,246  | 5,223  | 1,290 | 0,034  | 0,013 | -      | -      |
|           | Ethyl 3-Phenylpropanoate                          | 1,960   | 0,154  | -      | -     | -      | -     | 2,711  | 0,127  |
|           | Ethyl 3-Phenyl-2-propenoate                       | -       | -      | -      | -     | -      | -     | -      | -      |
|           | Ethyl Dodecanoate                                 | -       | -      | -      | -     | -      | -     | 1,799  | 0,325  |
| Aldehydes | 3-methylbutanal                                   | -       | -      | 1,293  | 0,007 | -      | -     | -      | -      |
|           | Phenylacetaldehyde                                | -       | -      | -      | -     | -      | -     | 0,061  | 0,005  |
|           | 2-phenyl-2-butenal                                | -       | -      | -      | -     | -      | -     | -      | -      |
|           | 4-methyl-2-phenyl-2-pentenal                      | 0,836   | 0,011  | 1,152  | 0,254 | -      | -     | 1,271  | 0,056  |
|           | 5-methyl-2-phneyl-2-hexenal                       | -       | -      | -      | -     | -      | -     | 1,332  | 0,062  |
| Ketones   | 3-hydroxi-2-butanone                              | -       | -      | -      | -     | -      | -     | -      | -      |
|           | 2-heptanone                                       | -       | -      | -      | -     | -      | -     | -      | -      |
|           | 2-octanone                                        | -       | -      | -      | -     | -      | -     | -      | -      |
|           | 2-nonanone                                        | -       | -      | -      | -     | -      | -     | -      | -      |
|           | 6-methyl-3,5-dihydroxi-2,3-dihydro-4h-pyran-4-one | 0,196   | 0,007  | 0,163  | 0,033 | -      | -     | -      | -      |
| Acids     | Acetic acid                                       | 16,319  | 10,988 | 0,492  | 2,420 | -      | -     | -      | -      |
|           | 2 methyl propanoic acid                           | -       | -      | -      | -     | 0,086  | 0,003 | -      | -      |
|           | 3-methylbutanoic acid                             | -       | -      | -      | -     | -      | -     | -      | -      |
|           | 2-methylbutanoic Acid                             | -       | -      | -      | -     | -      | -     | -      | -      |
|           | Decanoic acid                                     | -       | -      | -      | -     | -      | -     | -      | -      |
|           | Dodecanoic acid                                   | -       | -      | -      | -     | -      | -     | -      | -      |
| Pyrazines | 2-methylpyrazine                                  | -       | -      | -      | -     | -      | -     | -      | -      |



|           |                                                   |       |       |       |       |       |       |   |   |
|-----------|---------------------------------------------------|-------|-------|-------|-------|-------|-------|---|---|
|           | 2-octanone                                        | -     | -     | -     | -     | -     | -     | - | - |
|           | 2-nonanone                                        | -     | -     | -     | -     | -     | -     | - | - |
|           | 6-methyl-3,5-dihydroxi-2,3-dihydro-4h-pyran-4-one | 0,018 | 0,003 | 0,016 | 0,003 | -     | -     | - | - |
| Acids     | Acetic acid                                       | -     | -     | -     | -     | -     | -     | - | - |
|           | 2 methyl propanoic acid                           | -     | -     | -     | -     | 0,043 | 0,005 | - | - |
|           | 3-methylbutanoic acid                             | -     | -     | -     | -     | -     | -     | - | - |
|           | 2-methylbutanoic Acid                             | -     | -     | -     | -     | -     | -     | - | - |
|           | Decanoic acid                                     | -     | -     | -     | -     | -     | -     | - | - |
|           | Dodecanoic acid                                   | -     | -     | -     | -     | -     | -     | - | - |
| Pyrazines | 2-methylpyrazine                                  | -     | -     | -     | -     | -     | -     | - | - |
|           | 2,3,5-trimethylpyrazine                           | -     | -     | -     | -     | -     | -     | - | - |

Concentration matrix of volatile compounds produced by Yeast 173mrs, Yeast 187, Yeast 195 and Yeast 200.

| Family   | Name                    | Yeast 173 mrs |          | Yeast 187    |          | Yeast 195    |          | Yeast 200    |          |
|----------|-------------------------|---------------|----------|--------------|----------|--------------|----------|--------------|----------|
|          |                         | Con. (mg/kg)  | Est. Dev | Con. (mg/kg) | Est. Dev | Con. (mg/kg) | Est. Dev | Con. (mg/kg) | Est. Dev |
| Alcohols | Ethanol                 | 51,343        | -        | 32,101       | -        | 607,890      | -        | 164,650      | -        |
|          | 3-methylbutanol         | 11,508        | -        | 1,773        | -        | 65,427       | -        | -            | -        |
|          | 2-pentanol              | -             | -        | 0,081        | -        | -            | -        | 10,290       | -        |
|          | 2-phenylethanol         | 26,641        | -        | 0,582        | -        | 51,451       | -        | 32,603       | -        |
|          | alpha-terpinol          | -             | -        | 0,040        | -        | -            | -        | -            | -        |
|          | 2,4-DI-Tert-butylphenol | -             | -        | 1,316        | -        | -            | -        | -            | -        |
| Esters   | Ethyl acetate           | 2,252         | 0,344    | 3,536        | 0,014    | 8,466        | 2,351    | -            | -        |
|          | 2-pentyl acetate        | -             | -        | -            | -        | 8,863        | 0,343    | -            | -        |
|          | 3-methylbutyl acetate   | 0,890         | 0,045    | 48,889       | 2,018    | 55,069       | 0,049    | -            | -        |
|          | Methylpropil acetate    | 1,038         | 0,079    | 14,434       | 0,235    | -            | -        | 25,161       | 1,317    |
|          | Ethyl Benzoate          | -             | -        | 1,036        | 0,276    | 0,610        | 0,383    | 1,511        | 0,396    |
|          | Di-ethyl Butanodiate    | -             | -        | -            | -        | -            | -        | -            | -        |
|          | Ethyl Octanoate         | -             | -        | -            | -        | -            | -        | -            | -        |
|          | 2-phenylethyl acetate   | 1,655         | 0,782    | 19,576       | 1,600    | 25,170       | 9,344    | -            | -        |
|          | Ethyl Decanoate         | -             | -        | 3,216        | 0,658    | 2,783        | 0,866    | -            | -        |

|           |                                                   |       |       |       |       |        |       |       |       |
|-----------|---------------------------------------------------|-------|-------|-------|-------|--------|-------|-------|-------|
| Aldehydes | Ethyl 3-Phenylpropanoate                          | -     | -     | -     | -     | -      | -     | -     | -     |
|           | Ethyl 3-Phenyl-2-propenoate                       | -     | -     | -     | -     | 3,992  | 1,469 | 4,778 | 3,511 |
|           | Ethyl Dodecanoate                                 | -     | -     | -     | -     | -      | -     | -     | -     |
|           | 3-methylbutanal                                   | -     | -     | -     | -     | 3,947  | 0,794 | -     | -     |
|           | Phenylacetaldehyde                                | 0,955 | 0,110 | 1,225 | 0,417 | 12,219 | 3,138 | -     | -     |
|           | 2-phenyl-2-butenal                                | -     | -     | -     | -     | -      | -     | -     | -     |
|           | 4-methyl-2-phenyl-2-pentenal                      | 2,924 | 0,438 | -     | -     | -      | -     | -     | -     |
| Ketones   | 5-methyl-2-phneyl-2-hexenal                       | -     | -     | -     | -     | -      | -     | -     | -     |
|           | 3-hydroxi-2-butanone                              | -     | -     | -     | -     | -      | -     | -     | -     |
|           | 2-heptanone                                       | -     | -     | -     | -     | 0,918  | 0,030 | -     | -     |
|           | 2-octanone                                        | -     | -     | -     | -     | -      | -     | -     | -     |
|           | 2-nonanone                                        | -     | -     | -     | -     | -      | -     | -     | -     |
| Acids     | 6-methyl-3,5-dihydroxi-2,3-dihydro-4h-pyran-4-one | -     | -     | -     | -     | 0,180  | 0,041 | -     | -     |
|           | Acetic acid                                       | -     | -     | 1,028 | 0,092 | -      | -     | -     | -     |
|           | 2 methyl propanoic acid                           | -     | -     | -     | -     | -      | -     | -     | -     |
|           | 3-methylbutanoic acid                             | 0,345 | 0,096 | -     | -     | -      | -     | -     | -     |
|           | 2-methylbutanoic Acid                             | -     | -     | -     | -     | -      | -     | -     | -     |
|           | Decanoic acid                                     | -     | -     | -     | -     | 3,044  | 1,032 | -     | -     |
|           | Dodecanoic acid                                   | -     | -     | -     | -     | -      | -     | -     | -     |
| Pyrazines | 2-methylpyrazine                                  | -     | -     | -     | -     | -      | -     | 6,445 | -     |
|           | 2,3,5-trimethylpyrazine                           | -     | -     | -     | -     | -      | -     | 0,023 | -     |

Concentration matrix of volatile compounds produced by Yeast 218, Yeast 228, Yeast 231 and Yeast 233.

| Family   | Name            | Yeast 218    |          | Yeast 228    |          | Yeast 231    |          | Yeast 233    |          |
|----------|-----------------|--------------|----------|--------------|----------|--------------|----------|--------------|----------|
|          |                 | Con. (mg/kg) | Est. Dev |
| Alcohols | Ethanol         | 197,992      | -        | 27,454       | -        | 77,938       | -        | 54,310       | -        |
|          | 3-methylbutanol | 0,330        | -        | -            | -        | 14,264       | -        | 1,913        | -        |
|          | 2-pentanol      | 4,075        | -        | 0,803        | -        | -            | -        | -            | -        |
|          | 2-phenylethanol | 0,721        | -        | 0,664        | -        | 18,723       | -        | 0,585        | -        |
|          | alpha-terpinol  | -            | -        | -            | -        | 0,527        | -        | 0,405        | -        |

|           |                                                   |         |        |       |       |         |        |       |       |
|-----------|---------------------------------------------------|---------|--------|-------|-------|---------|--------|-------|-------|
| Esters    | 2,4-DI-Tert-butylphenol                           | -       | -      | -     | -     | -       | -      | 0,333 | -     |
|           | Ethyl acetate                                     | 49,330  | 14,654 | -     | -     | 78,757  | 21,847 | -     | -     |
|           | 2-penthyl acetate                                 | -       | -      | -     | -     | -       | -      | 0,292 | 0,247 |
|           | 3-methylbutyl acetate                             | 248,361 | 43,971 | -     | -     | 27,540  | 2,732  | 0,441 | 0,080 |
|           | Methylpropil acetate                              | -       | -      | -     | -     | -       | -      | 0,207 | 0,032 |
|           | Ethyl Benzoate                                    | -       | -      | -     | -     | 0,609   | 0,071  | -     | -     |
|           | Di-ethyl Butanodiate                              | -       | -      | -     | -     | 3,843   | 0,353  | -     | -     |
|           | Ethyl Octanoate                                   | 2,808   | 0,086  | -     | -     | -       | -      | -     | -     |
|           | 2-phenylethyl acetate                             | 276,797 | 27,968 | -     | -     | 140,079 | 4,353  | 0,237 | 0,021 |
|           | Ethyl Decanoate                                   | 0,618   | 0,076  | -     | -     | -       | -      | 0,560 | 0,114 |
|           | Ethyl 3-Phenylpropanoate                          | 3,889   | 0,325  | -     | -     | 5,278   | 0,136  | 1,723 | 0,219 |
| Aldehydes | Ethyl 3-Phenyl-2-propenoate                       | -       | -      | 0,570 | 0,036 | -       | -      | -     | -     |
|           | Ethyl Dodecanoate                                 | -       | -      | -     | -     | 10,459  | 3,952  | -     | -     |
|           | 3-methylbutanal                                   | -       | -      | -     | -     | -       | -      | -     | -     |
|           | Phenylacetaldehyde                                | -       | -      | -     | -     | -       | -      | -     | -     |
|           | 2-phenyl-2-butenal                                | -       | -      | -     | -     | -       | -      | 0,076 | 0,011 |
| Ketones   | 4-methyl-2-phenyl-2-pentenal                      | 0,976   | 0,015  | -     | -     | 1,536   | 0,051  | 0,424 | 0,040 |
|           | 5-methyl-2-phneyl-2-hexenal                       | -       | -      | -     | -     | 3,079   | 3,062  | -     | -     |
|           | 3-hydroxi-2-butanone                              | -       | -      | -     | -     | -       | -      | -     | -     |
|           | 2-heptanone                                       | -       | -      | -     | -     | -       | -      | -     | -     |
|           | 2-octanone                                        | -       | -      | -     | -     | -       | -      | -     | -     |
|           | 2-nonanone                                        | -       | -      | -     | -     | -       | -      | -     | -     |
|           | 6-methyl-3,5-dihydroxi-2,3-dihydro-4h-pyran-4-one | 0,061   | 0,007  | -     | -     | -       | -      | -     | -     |
| Acids     | Acetic acid                                       | -       | -      | -     | -     | -       | -      | -     | -     |
|           | 2 methyl propanoic acid                           | -       | -      | -     | -     | -       | -      | -     | -     |
|           | 3-methylbutanoic acid                             | -       | -      | -     | -     | 0,455   | 0,185  | -     | -     |
|           | 2-methylbutanoic Acid                             | -       | -      | -     | -     | -       | -      | -     | -     |
|           | Decanoic acid                                     | -       | -      | -     | -     | -       | -      | -     | -     |
|           | Dodecanoic acid                                   | -       | -      | -     | -     | -       | -      | -     | -     |
| Pyrazines | 2-methylpyrazine                                  | -       | -      | -     | -     | -       | -      | -     | -     |
|           | 2,3,5-trimethylpyrazine                           | -       | -      | -     | -     | -       | -      | -     | -     |

Concentration matrix of volatile compounds produced by Yeast 236, Yeast 241b, Yeast 224 and Yeast 246.

| Family    | Name                         | Yeast 236    |          | Yeast 241b   |          | Yeast 244    |          | Yeast 246    |          |
|-----------|------------------------------|--------------|----------|--------------|----------|--------------|----------|--------------|----------|
|           |                              | Con. (mg/kg) | Est. Dev |
| Alcohols  | Ethanol                      | 45,160       | -        | -            | -        | 48,805       | -        | 974,845      | -        |
|           | 3-methylbutanol              | 2,921        | -        | 0,332        | -        | 5,392        | -        | 34,919       | -        |
|           | 2-pentanol                   | -            | -        | -            | -        | -            | -        | -            | -        |
|           | 2-phenylethanol              | 1,146        | -        | 0,759        | -        | 8,438        | -        | 38,524       | -        |
|           | alpha-terpinol               | 2,445        | -        | -            | -        | 0,407        | -        | 1,771        | -        |
|           | 2,4-DI-Tert-butylphenol      | 0,585        | -        | -            | -        | -            | -        | -            | -        |
| Esters    | Ethyl acetate                | -            | -        | -            | -        | 1,898        | 1,603    | -            | -        |
|           | 2-pentyl acetate             | -            | -        | -            | -        | -            | -        | 14,538       | 1,015    |
|           | 3-methylbutyl acetate        | 1,118        | 0,324    | 0,710        | 0,216    | -            | -        | 81,755       | 2,460    |
|           | Methylpropil acetate         | -            | -        | -            | -        | 10,769       | 3,533    | -            | -        |
|           | Ethyl Benzoate               | -            | -        | 0,248        | 0,169    | 0,064        | 0,047    | -            | -        |
|           | Di-ethyl Butanodiate         | -            | -        | -            | -        | 2,732        | 0,903    | -            | -        |
|           | Ethyl Octanoate              | -            | -        | -            | -        | -            | -        | -            | -        |
|           | 2-phenylethyl acetate        | 0,645        | 0,159    | 0,084        | 0,008    | -            | -        | -            | -        |
|           | Ethyl Decanoate              | 0,702        | 0,609    | -            | -        | 0,821        | 0,562    | 5,548        | 0,730    |
|           | Ethyl 3-Phenylpropanoate     | 4,195        | 0,540    | 0,848        | 0,165    | 1,957        | 0,806    | 6,663        | 0,231    |
|           | Ethyl 3-Phenyl-2-propenoate  | -            | -        | -            | -        | -            | -        | -            | -        |
|           | Ethyl Dodecanoate            | 5,748        | 1,920    | -            | -        | 3,261        | 1,553    | -            | -        |
| Aldehydes | 3-methylbutanal              | -            | -        | -            | -        | 1,154        | 0,251    | 18,668       | 2,997    |
|           | Phenylacetaldehyde           | -            | -        | -            | -        | -            | -        | 54,084       | 19,813   |
|           | 2-phenyl-2-butenal           | -            | -        | -            | -        | -            | -        | -            | -        |
|           | 4-methyl-2-phenyl-2-pentenal | 1,212        | 0,642    | -            | -        | 0,875        | 0,247    | 2,995        | 0,330    |
|           | 5-methyl-2-phneyl-2-hexenal  | -            | -        | -            | -        | -            | -        | -            | -        |
| Ketones   | 3-hydroxi-2-butanone         | -            | -        | -            | -        | -            | -        | -            | -        |
|           | 2-heptanone                  | -            | -        | -            | -        | -            | -        | 1,496        | 0,040    |
|           | 2-octanone                   | 0,025        | 0,008    | -            | -        | -            | -        | -            | -        |
|           | 2-nonanone                   | -            | -        | -            | -        | -            | -        | -            | -        |

|           |                                                   |       |       |       |       |       |       |       |       |
|-----------|---------------------------------------------------|-------|-------|-------|-------|-------|-------|-------|-------|
|           | 6-methyl-3,5-dihydroxi-2,3-dihydro-4h-pyran-4-one | -     | -     | 0,011 | 0,003 | -     | -     | -     | -     |
| Acids     | Acetic acid                                       | 0,094 | 0,057 | -     | -     | -     | -     | 1,388 | 0,120 |
|           | 2 methyl propanoic acid                           | -     | -     | -     | -     | -     | -     | -     | -     |
|           | 3-methylbutanoic acid                             | -     | -     | 0,176 | 0,079 | 0,276 | 0,001 | -     | -     |
|           | 2-methylbutanoic Acid                             | -     | -     | -     | -     | -     | -     | -     | -     |
|           | Decanoic acid                                     | -     | -     | -     | -     | -     | -     | -     | -     |
|           | Dodecanoic acid                                   | -     | -     | -     | -     | -     | -     | -     | -     |
| Pyrazines | 2-methylpyrazine                                  | -     | -     | -     | -     | -     | -     | -     | -     |
|           | 2,3,5-trimethylpyrazine                           | -     | -     | -     | -     | -     | -     | -     | -     |
